# Supplementary material for: Multicomponent spiropolymerization of diisocyanides, alkynes and carbon dioxide for constructing 1,6-dioxospiro[4,4]nonane-3,8-diene as structural units under one-pot catalyst-free conditions
Source: Royal Society of Chemistry journal article supplement (doi:10.1039/c8py01336e), 2018-01-01
Supplement: c8py01336e1.pdf [file c8py01336e1.pdf]

## Electronic Supplementary Information (ESI)

for

### Multicomponent Spiropolymerization of Diisocyanides, Alkynes and Carbon Dioxide for Constructing 1,6-Dioxospiro[4,4]nonane-3,8-diene as Structural Units under One-Pot Catalyst-Free Conditions

Weiqliang Fu,<sup>a</sup> Lichao Dong,<sup>a</sup> Jianbing Shi,<sup>\*a</sup> Bin Tong,<sup>a</sup> Zhengxu Cai,<sup>a</sup> Junge Zhi,<sup>b</sup> and Yuping Dong<sup>\*a</sup>

<sup>a</sup> Beijing Key Laboratory of Construction Tailorable Advanced Functional Materials and Green Applications, School of Materials Science and Engineering, and <sup>b</sup> Key Laboratory of Cluster Science of Ministry of Education, School of Chemistry and Chemical Engineering, Beijing Institute of Technology, Beijing 100081, China.

\*Corresponding authors.

E-mail: [bing@bit.edu.cn](mailto:bing@bit.edu.cn) (J. S.); [chdongyp@bit.edu.cn](mailto:chdongyp@bit.edu.cn) (Y. D.).

#### Table of Contents

|                                                                   |    |
|-------------------------------------------------------------------|----|
| 1 Experimental                                                    |    |
| 1.1 Materials.....                                                | 2  |
| 1.2 Equipments .....                                              | 2  |
| 1.3 Synthesis of monomers <b>1a</b> - <b>1d</b> .....             | 2  |
| 1.4 Characterization data of monomers <b>1a</b> - <b>1d</b> ..... | 3  |
| 1.5 Synthetic route to <b>MC</b> .....                            | 3  |
| 1.6 Characterization data of <b>MC</b> .....                      | 4  |
| 2 FT-IR spectra of spiropolymers.....                             | 4  |
| 3 <sup>1</sup> H NMR spectra of spiropolymers.....                | 7  |
| 4 <sup>13</sup> C NMR spectra of spiropolymers.....               | 10 |
| 5 The DSC results of spiropolymers.....                           | 13 |
| 6 Normalized UV-vis absorption spectra of spiropolymers.....      | 15 |

## 1 Experimental

### 1.1 Materials

Unless stated otherwise, all chemicals were obtained from commercial suppliers and used without further purification. The monomers **1a** - **d** were synthesized according to the commonly used synthetic routes as shown in Scheme S1. Benzyltriethylammonium chloride and trans-1,4-diaminocyclohexane, 4, 4' - methylenebis(cyclohexylamine) were bought from Heowns. 1,4-bis(aminomethyl) benzene, 4,4'-methylenebis(2,6-diethylaniline), dimethyl acetylenedicarboxylate and diethyl acetylenedicarboxylate were bought from Energy Chemical. Chloroform-d was bought from Innochem.

### 1.2 Equipments

Weight-average molecular weights ( $M_w$ ) and polydispersity indices ( $M_w/M_n$ ) of the polymers were obtained from gel permeation chromatography (GPC) system equipped with a Waters 1515 isocratic HPLC pump and Waters 2414 refractive index detector. Polystyrene standard was utilized and THF was used as the eluent at a flow rate of 1.0 mL min<sup>-1</sup>. Fourier transform infrared (FT-IR) spectra were measured on a Bruker (ALPHA) spectrometer. <sup>1</sup>H NMR spectra were measured on a Bruker AV 400 spectrometer. Mass spectra were collected by using a Finnigan BIFLEX III mass spectrometer. Thermogravimetric analysis (TGA) was carried out on a PerkinElmer STA 8000 at a heating rate of 10 °C min<sup>-1</sup> under a nitrogen flow. Differential scanning calorimeter (DSC) was measured on a TA DSC Q2000. UV-Vis spectra were recorded on a TU-1901 double beam UV-Vis spectrophotometer.

### 1.3 Synthesis of monomers **1a** ~ **d**

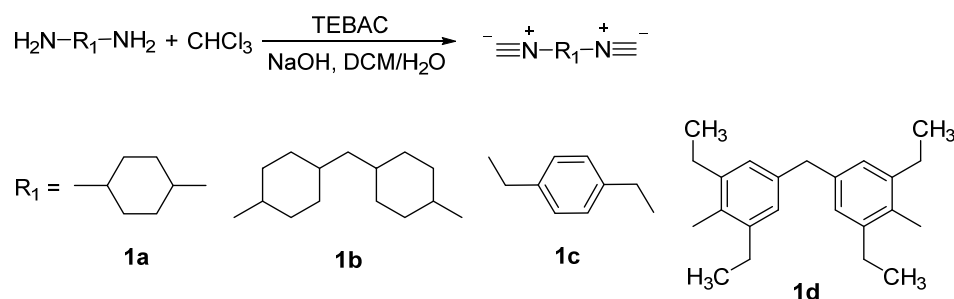

**Scheme S1.** The synthetic route to monomers **1a** - **d**

Monomers **1a** - **d** were prepared by the same steps. The synthesis procedure of **1b** - **d** is almost the same with that of **1a**. The detailed method for the synthesis of **1a** was given here as an example.

Trans-1,4-diisocyanocyclohexane (**1a**): To a 500 mL round-bottom flask were added trans-1,4-diaminocyclohexane (8.1200 g, 50 mmol), DCM (20 mL), chloroform (8.044 mL, 100 mmol) and TEBAC (0.2278 g, 1 mmol). A 50% aqueous solution of sodium hydroxide (15 mL) was added. The mixture was heated at 40 °C for 12 hours. The organic layer was combined and washed with DCM and water, and then dried over MgSO<sub>4</sub> for an hour. Product **1a** was separated by flash column chromatograph.

#### 1.4 Characterization data of monomers **1a - d**

Characterization data of trans-1,4-diisocyanocyclohexane **1a**: White powder of **1a** was obtained in 30.4% yield. <sup>1</sup>H NMR (400 MHz, CDCl<sub>3</sub>): δ = 3.80 (m, 2H), 2.02-1.99 (d, *J* = 10.4 Hz, 4H), 1.76-1.74 (m, *J* = 6.8 Hz, 4H). <sup>13</sup>C NMR (100 MHz, CDCl<sub>3</sub>): δ = 156.21-156.11 (t, *J* = 4.9 Hz), 49.66-49.55 (t, *J* = 5.6 Hz), 26.86. HRMS (EI, *m/z*) Calcd for [M+H]<sup>+</sup> C<sub>8</sub>H<sub>10</sub>N<sub>2</sub>: 134.0844, Found: 134.0843, error: -0.7 ppm.

Characterization data of 4,4'-methylenebis(cyclohexylisocyno) **1b**: White powder of **1b** was obtained in 34.5% yield. <sup>1</sup>H NMR (400 MHz, CDCl<sub>3</sub>): δ = 3.90 (m, 1H), 3.37-3.33 (m, 2H), 2.17-2.14 (d, *J* = 12.0 Hz, 4H), 1.96-1.92 (d, *J* = 12.8 Hz, 2H), 1.76-1.73 (d, *J* = 10.8 Hz, 5H), 1.61-1.50 (m, 9H), 1.36-1.33 (m, 6H), 1.13 (s, 1H), 1.07-1.03 (t, *J* = 7.2 Hz, 1H), 0.92-0.84 (m, 4H). <sup>13</sup>C NMR (100 MHz, CDCl<sub>3</sub>): δ = 154.94-154.78 (q, *J* = 10.4 Hz), 153.86-153.70 (q, *J* = 10.8 Hz), 52.31-52.14 (q, *J* = 10.8 Hz), 50.66-50.51 (q, *J* = 10.0 Hz), 43.58, 43.42, 43.17, 33.34-33.26 (t, *J* = 4.3 Hz), 33.04, 32.94, 32.73, 30.94, 30.61, 30.59, 27.00. HRMS (ESI, *m/z*) Calcd for [M+Na]<sup>+</sup> C<sub>15</sub>H<sub>22</sub>N<sub>2</sub>Na: 230.1681, Found: 230.1671, error: -3.9 ppm.

Characterization data of 1,4-bis(isocyanomethyl)benzene **1c**: White powder of **1c** was obtained in 42.0% yield. <sup>1</sup>H NMR (400 MHz, CDCl<sub>3</sub>): δ = 7.39 (s, 4H), 4.66 (m, 4H); <sup>13</sup>C NMR (100 MHz, CDCl<sub>3</sub>): 158.26-158.16 (t, *J* = 5.1 Hz), 132.75, 121.31, 45.27-45.12 (t, *J* = 7.3 Hz). HRMS (EI, *m/z*) Calcd for [M+H]<sup>+</sup> C<sub>10</sub>H<sub>8</sub>N<sub>2</sub>: 156.0687, Found: 156.0684, error: -1.9 ppm.

Characterization data of 1,1-bis(3-ethyl-4-isocyano-5-ethylphenyl)methane **1d**: White powder of **1d** was obtained in 44.7% yield. <sup>1</sup>H NMR (400 MHz, CDCl<sub>3</sub>): δ = 6.91 (s, 4H), 3.92 (s, 2H), 2.78-2.72 (q, *J* = 7.6 Hz, 8H), 1.26-1.22 (t, *J* = 7.6 Hz, 12H); <sup>13</sup>C NMR (100 MHz, CDCl<sub>3</sub>): δ = 167.92, 141.51, 141.06, 126.82, 41.53, 25.87, 13.97. HRMS (EI, *m/z*) Calcd for [M+H]<sup>+</sup> C<sub>23</sub>H<sub>26</sub>N<sub>2</sub>: 330.2096, Found: 330.2096, error: 0 ppm.

#### 1.5 Synthetic route to MC

The synthetic route has shown in Scheme 2. To a 30 mL Schlenk tube equipped with a magnetic stir bar were added dimethyl acetylenedicarboxylate **2a** (0.1705 g,

1.2 mmol) and 6 mL toluene. Then, cyclohexyl isocyanide (0.1091 g, 1.0 mmol) was slowly added. The reaction mixture was heated in an oil bath at 80 °C for 12 h under constant stirring under CO<sub>2</sub> atmosphere, cooled to room temperature. The organic layer was combined and washed with DCM and water, and then dried over MgSO<sub>4</sub> for an hour. **MC** was separated by flash column chromatograph.

### 1.6 Characterization data of MC

White powder of **MC** was obtained in 54.0% yield. <sup>1</sup>H NMR (400 MHz, CDCl<sub>3</sub>): δ = 3.96 (s, 6H), 3.78 (s, 6H), 3.63 (m, 2H), 1.74-1.71 (m, 4H), 1.62-1.57 (m, 4H), 1.43-1.16 (m, 12H); <sup>13</sup>C NMR (100 MHz, CDCl<sub>3</sub>): δ = 161.44, 159.68, 150.63, 139.74, 135.87, 111.33, 57.26, 53.36, 53.33, 52.98, 52.95, 33.30, 32.95, 25.59, 24.59, 24.49. HRMS (EI, *m/z*) Calcd for [M+H]<sup>+</sup> C<sub>27</sub>H<sub>34</sub>N<sub>2</sub>O<sub>10</sub>: 546.2213, Found: 546.2222, error: +1.6 ppm.

## 2 FT-IR spectra of spiropolymers

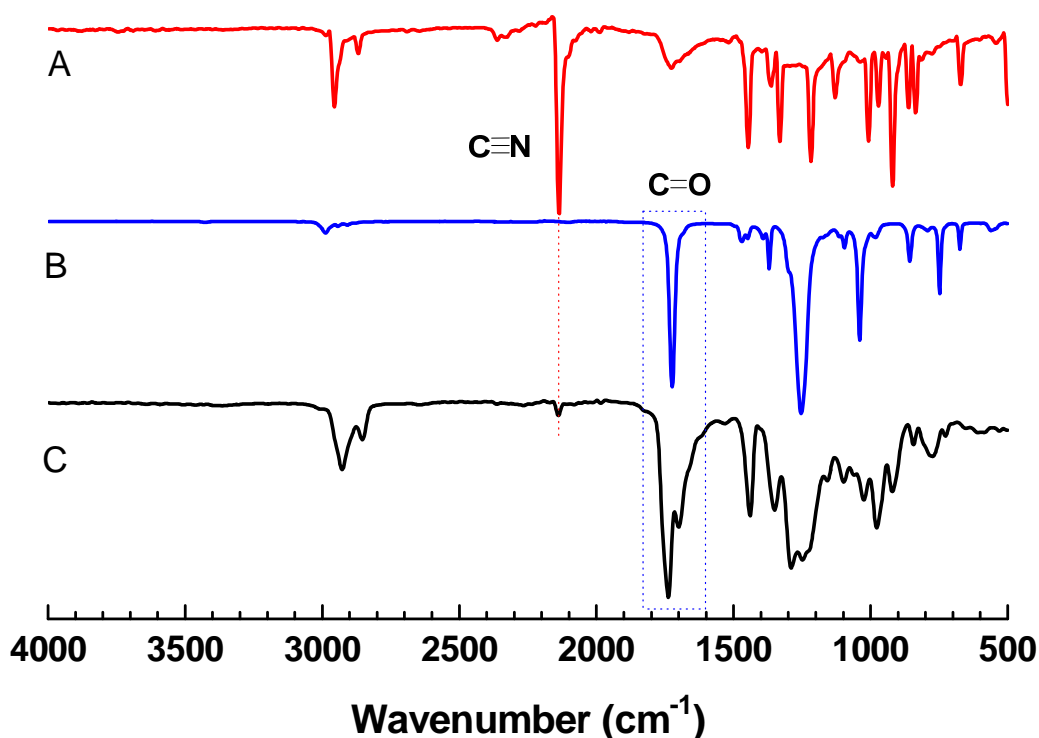

Figure S1. FT-IR spectra of (A) **1a**, (B) **2b**, and (C) **P1a2b**.

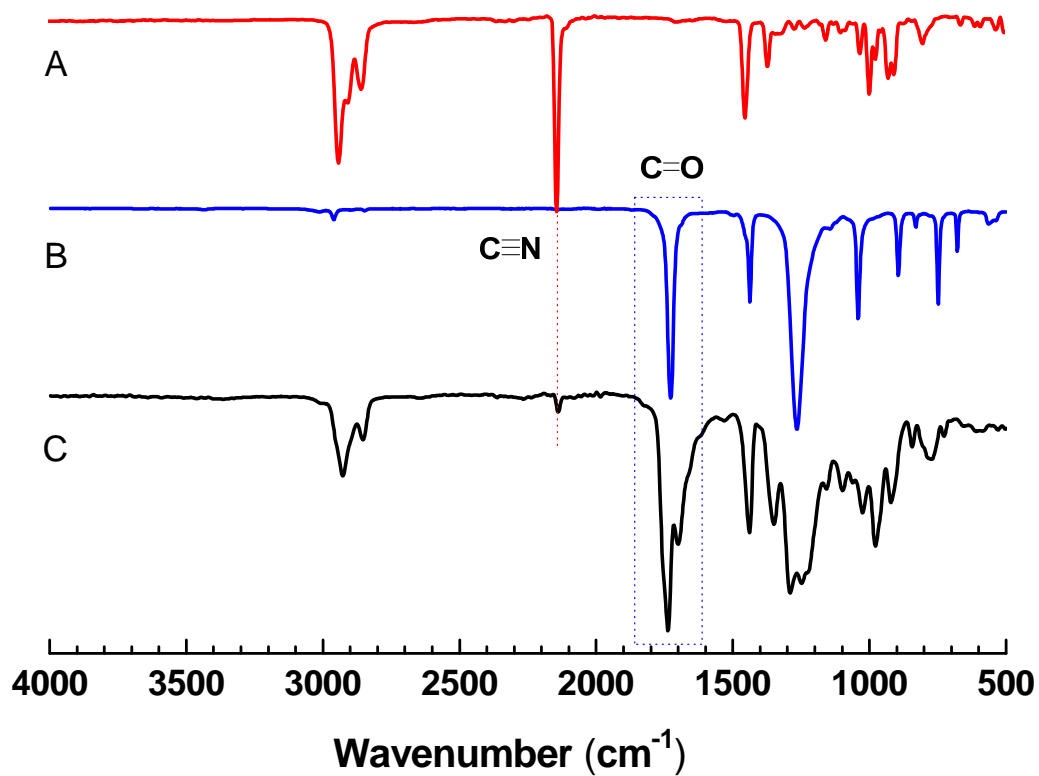

Figure S2. FT-IR spectra of (A) **1b**, (B) **2a**, and (C) **P1b2a**.

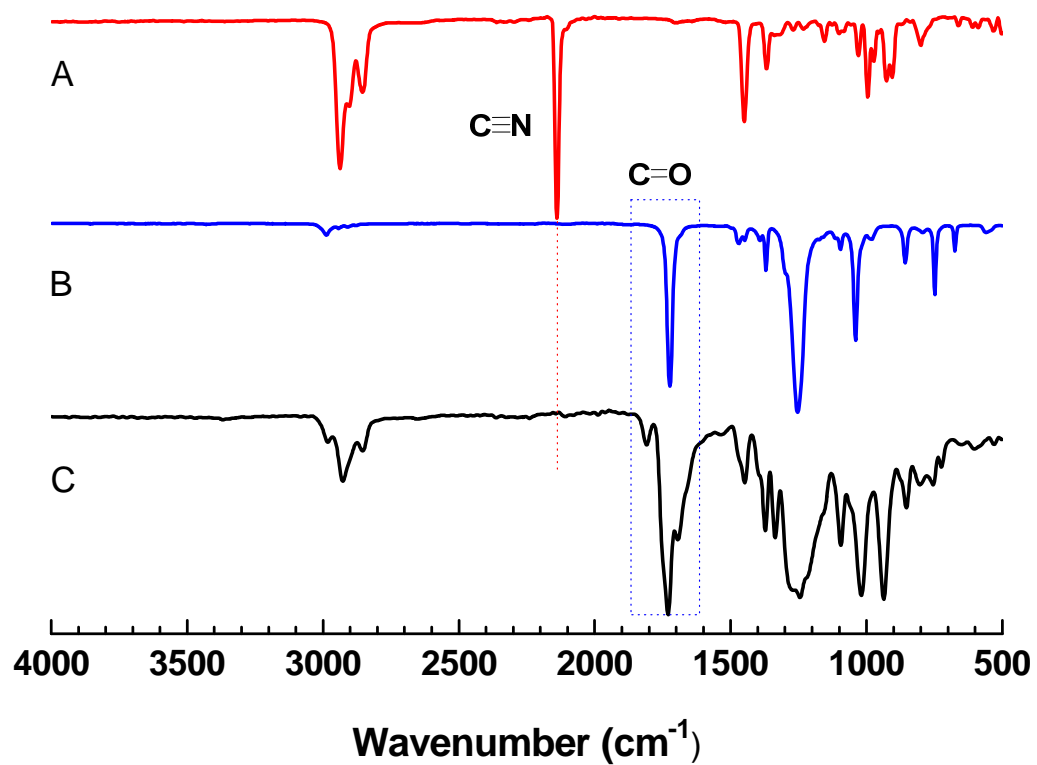

Figure S3. FT-IR spectra of (A) **1b**, (B) **2b**, and (C) **P1b2b**.

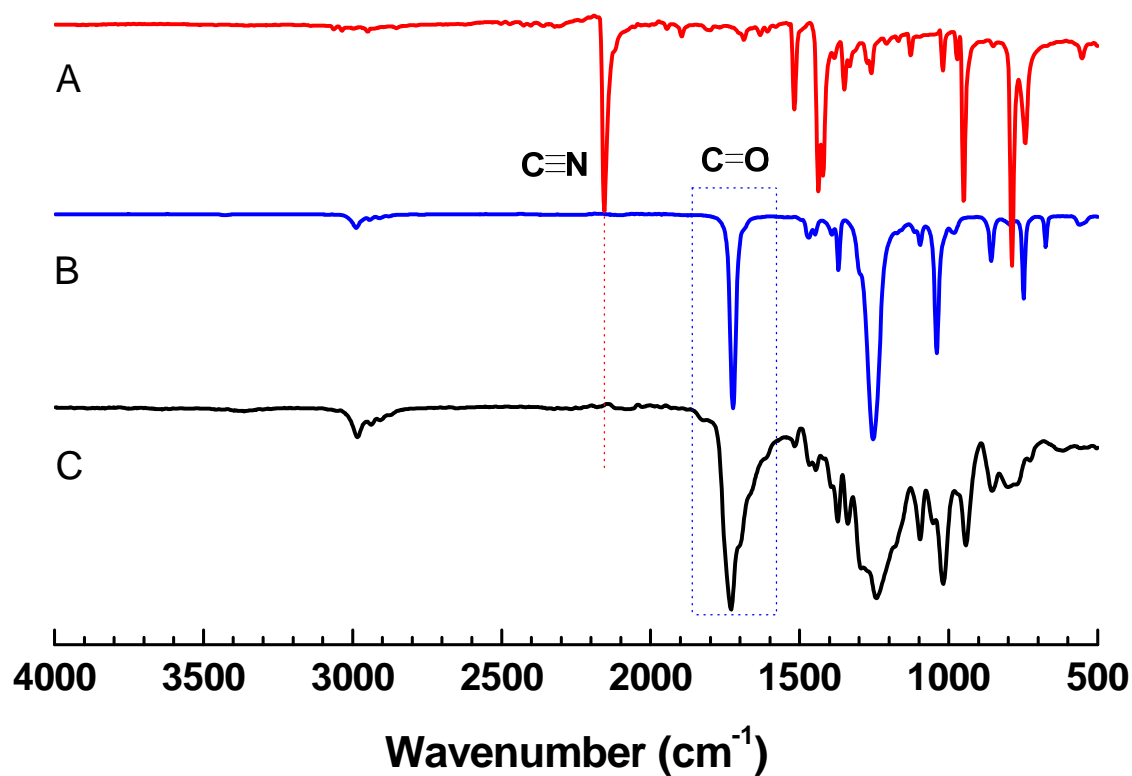

Figure S4. FT-IR spectra of (A) **1c**, (B) **2b**, and (C) **P1c2b**.

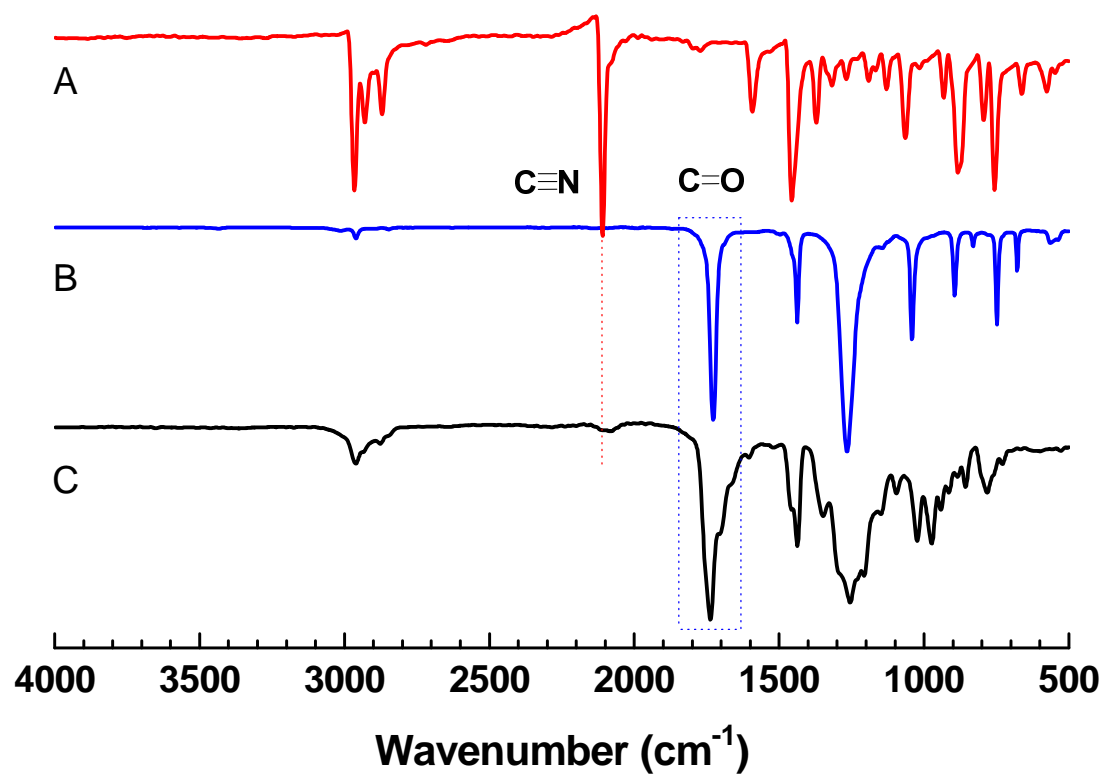

Figure S5. FT-IR spectra of (A) **1d**, (B) **2a**, and (C) **P1d2a**.

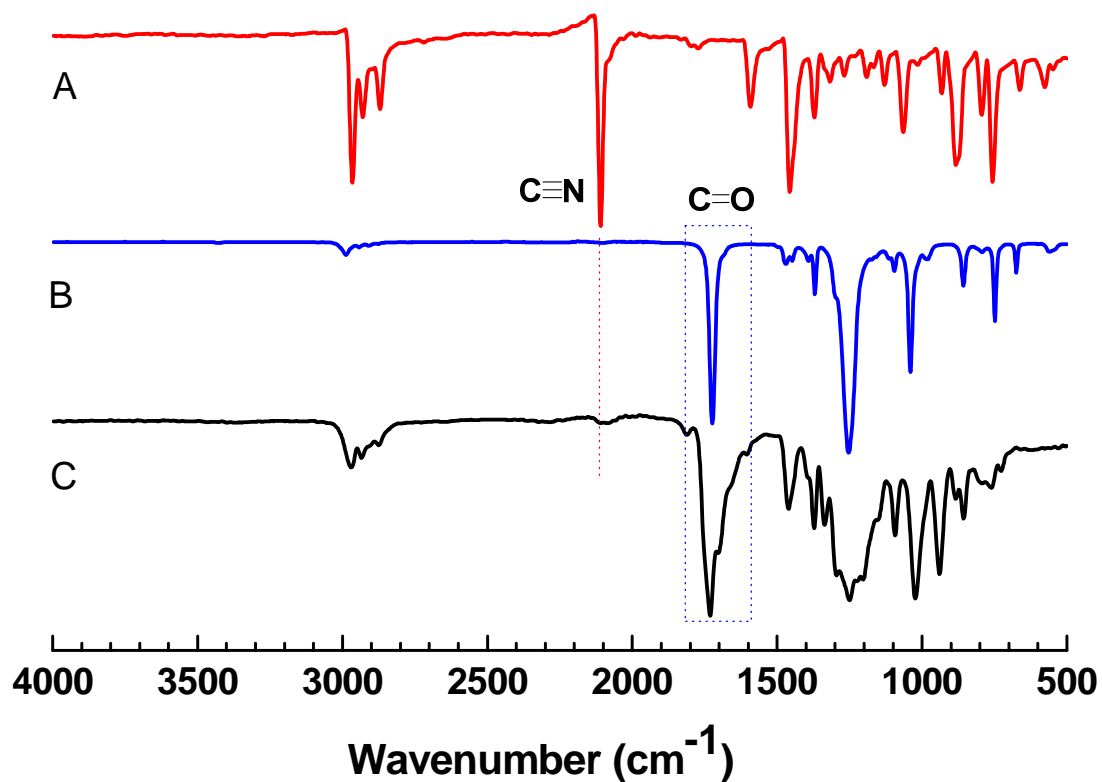

Figure S6. FT-IR spectra of (A) **1d**, (B) **2b**, and (C) **P1d2b**.

### **<sup>1</sup>H NMR spectra of spiropolymers**

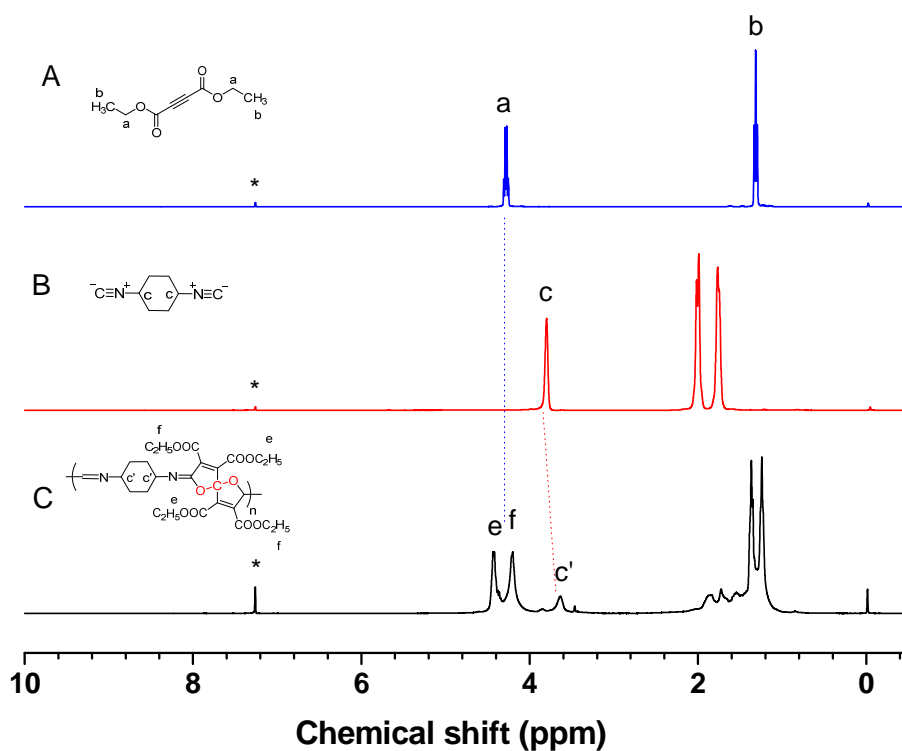

Figure S7. <sup>1</sup>H NMR spectra of (A) **1a**, (B) **2b**, and (C) **P1a2b** in CDCl<sub>3</sub>. The solvent peaks are marked with asterisks.

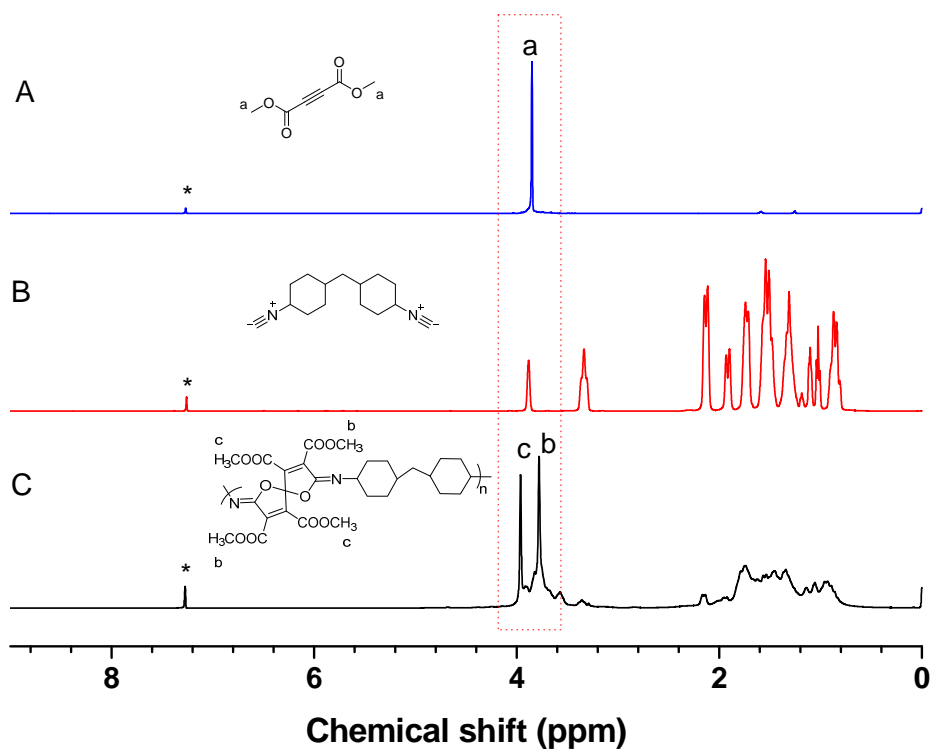

**Figure S8.**  $^1\text{H}$  NMR spectra of (A) **1b**, (B) **2a**, and (C) **P1b2a** in  $\text{CDCl}_3$ . The solvent peaks are marked with asterisks.

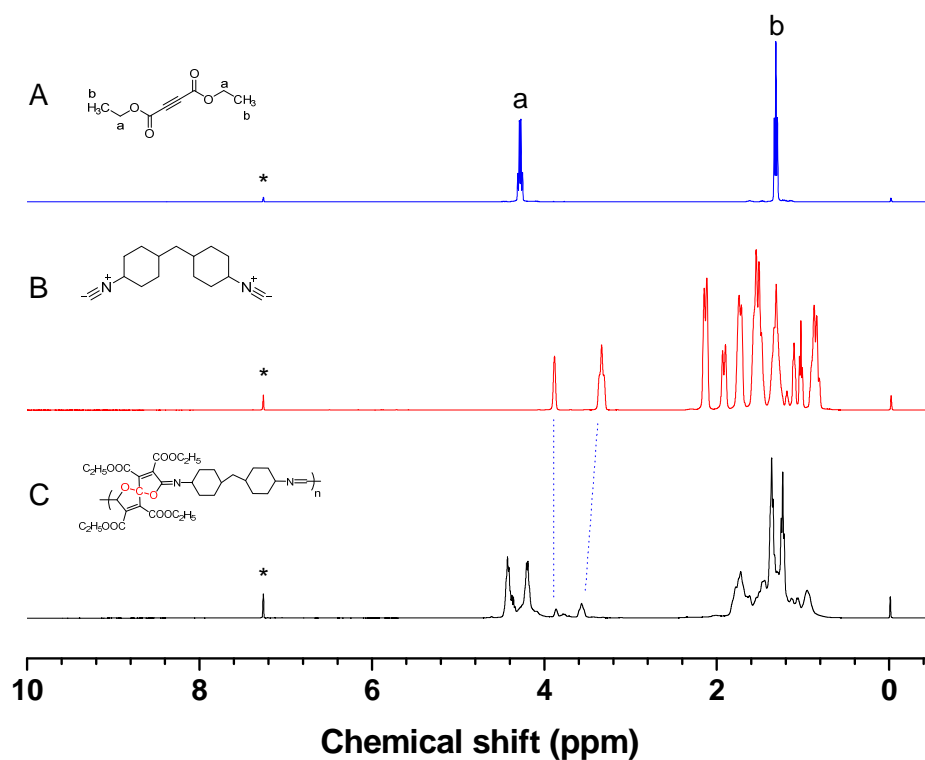

**Figure S9.**  $^1\text{H}$  NMR spectra of (A) **1b**, (B) **2b**, and (C) **P1b2b** in  $\text{CDCl}_3$ . The solvent peaks are marked with asterisks.



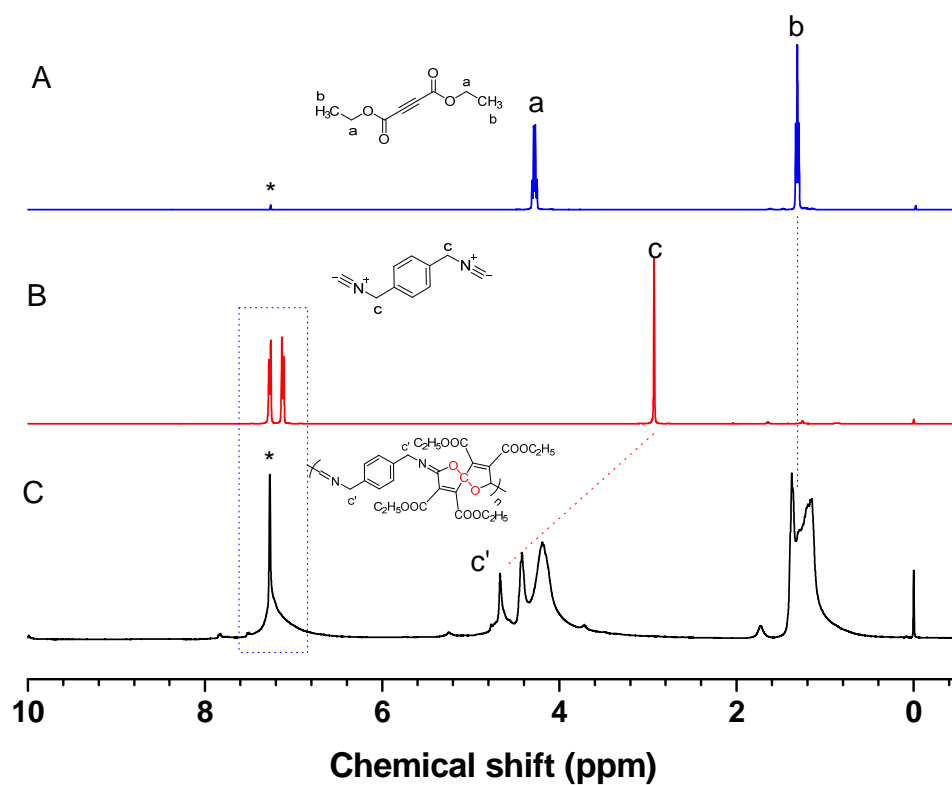

**Figure S10.**  $^1\text{H}$  NMR spectra of (A) **1c**, (B) **2b**, and (C) **P1c2b** in  $\text{CDCl}_3$ . The solvent peaks are marked with asterisks.

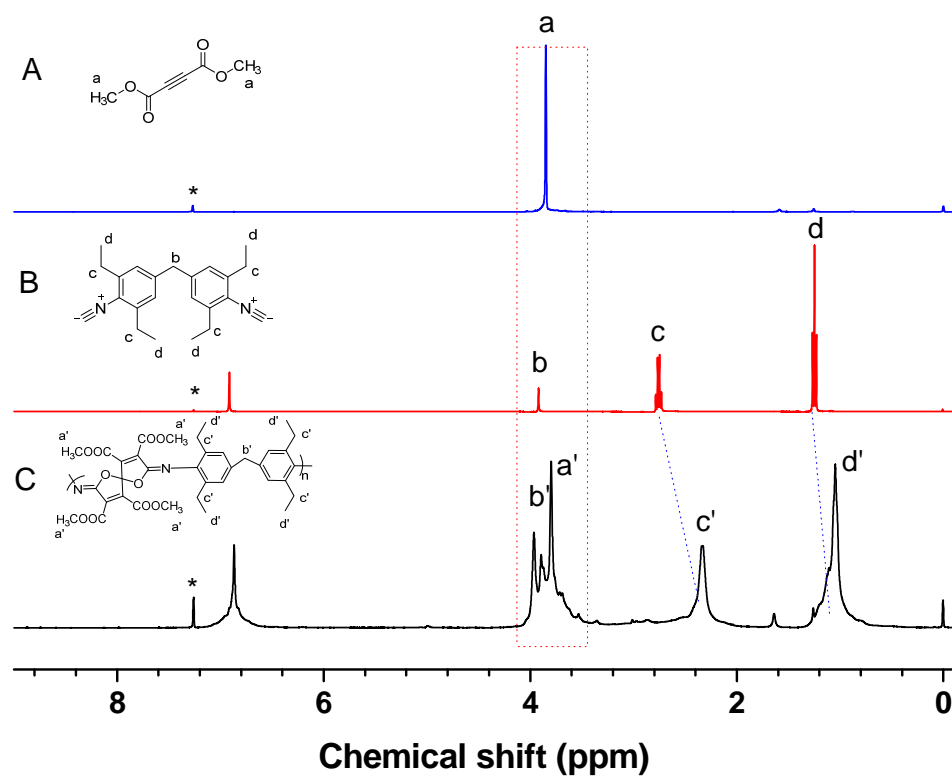

**Figure S11.**  $^1\text{H}$  NMR spectra of (A) **1d**, (B) **2a**, and (C) **P1d2a** in  $\text{CDCl}_3$ . The solvent peaks are marked with asterisks.

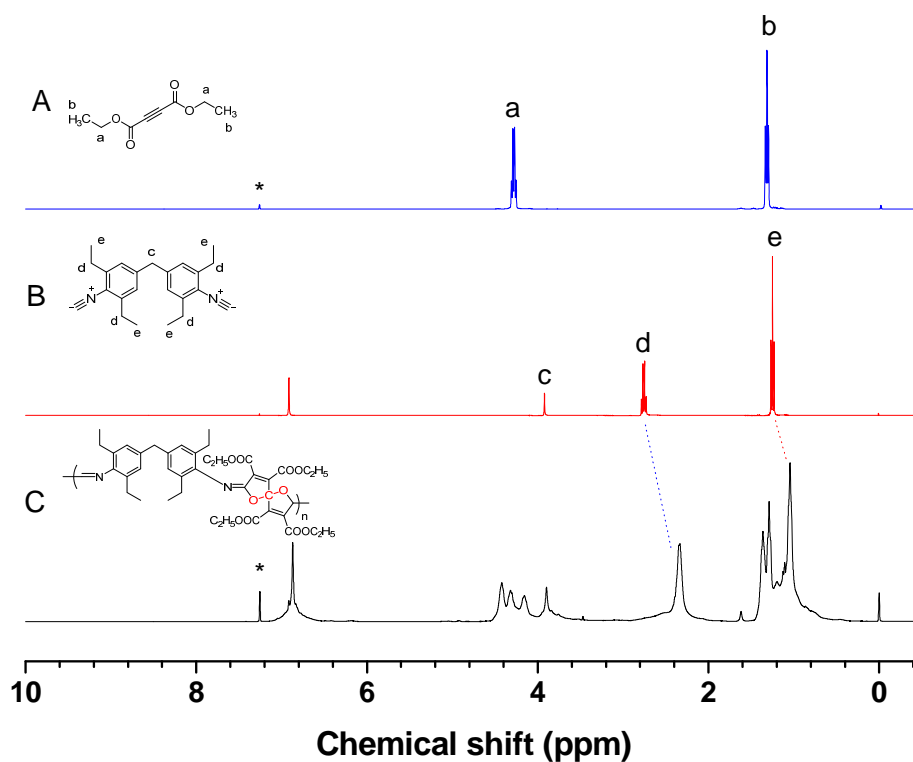

**Figure S12.**  $^1\text{H}$  NMR spectra of (A) 1d, (B) 2b, and (C) P1d2b in  $\text{CDCl}_3$ . The solvent peaks are marked with asterisks.

#### 4 $^{13}\text{C}$ NMR spectra of spiropolymers

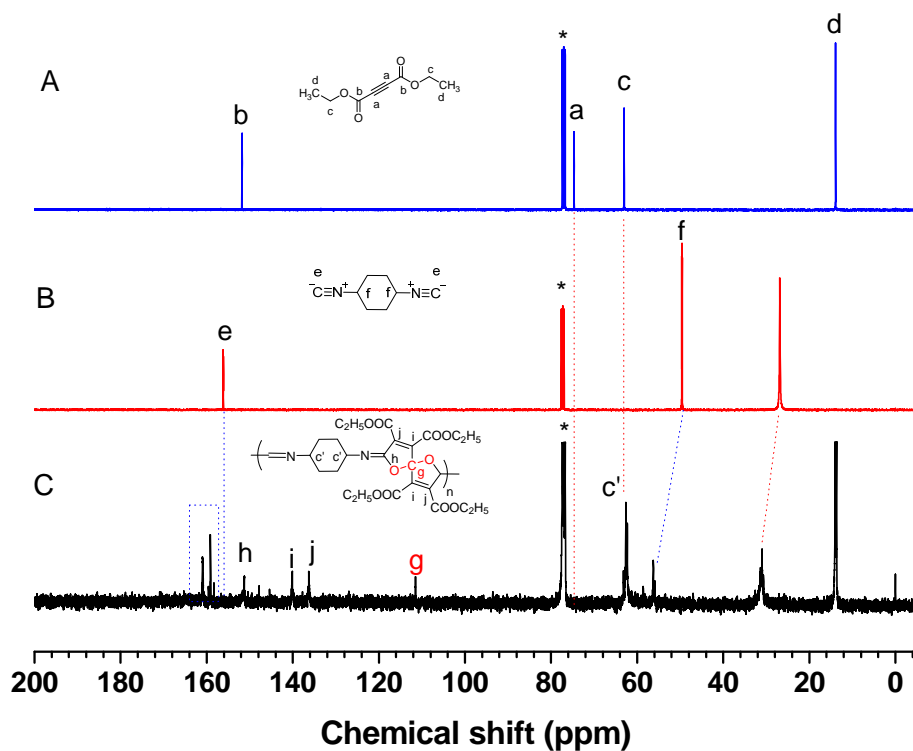

**Figure S13.**  $^{13}\text{C}$  NMR spectra of (A) 1a, (B) 2b, and (C) P1a2b in  $\text{CDCl}_3$ . The solvent peaks are marked with asterisks.

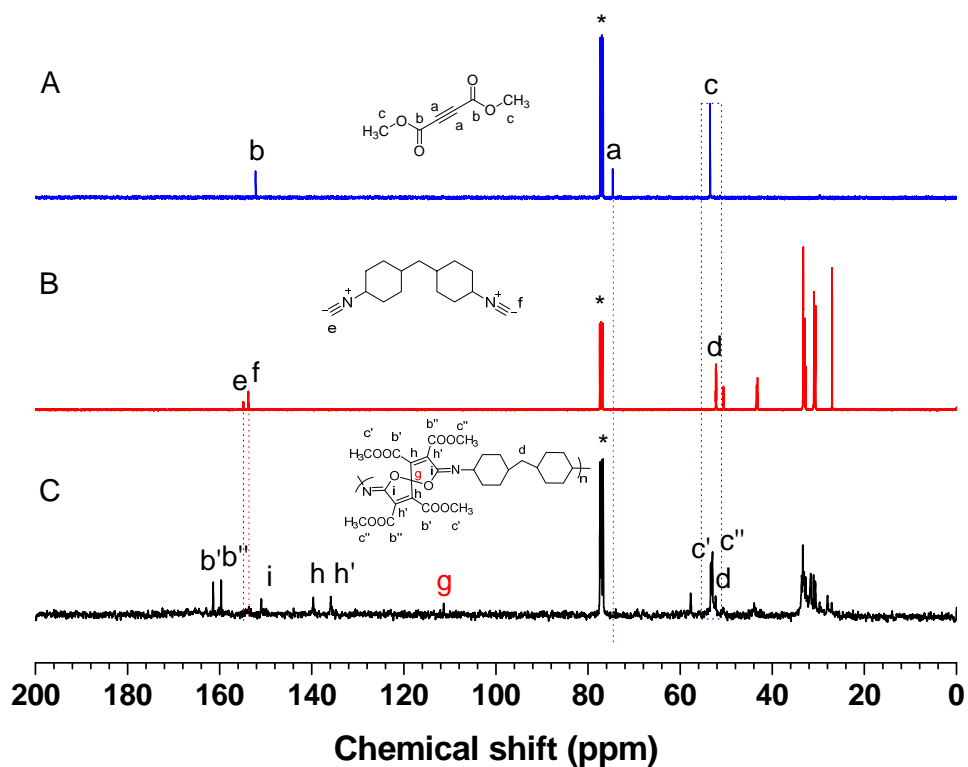

**Figure S14.**  $^{13}\text{C}$  NMR spectra of (A) **1b**, (B) **2a**, and (C) **P1b2a** in  $\text{CDCl}_3$ . The solvent peaks are marked with asterisks.

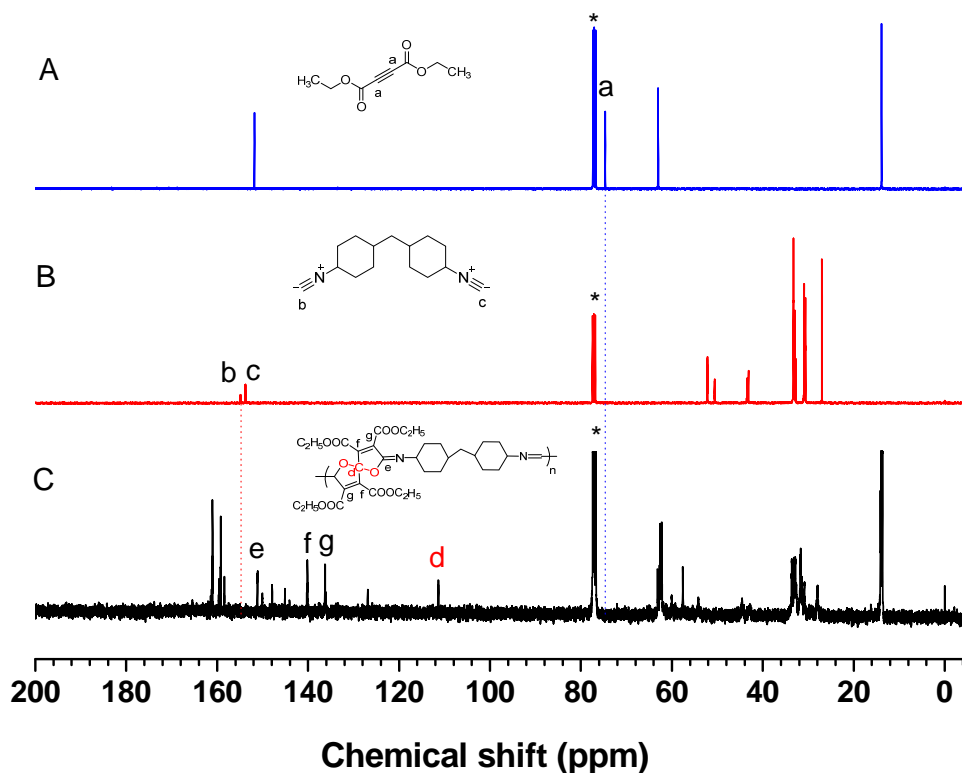

**Figure S15.**  $^{13}\text{C}$  NMR spectra of (A) **1b**, (B) **2b**, and (C) **P1b2b** in  $\text{CDCl}_3$ . The solvent peaks are marked with asterisks.

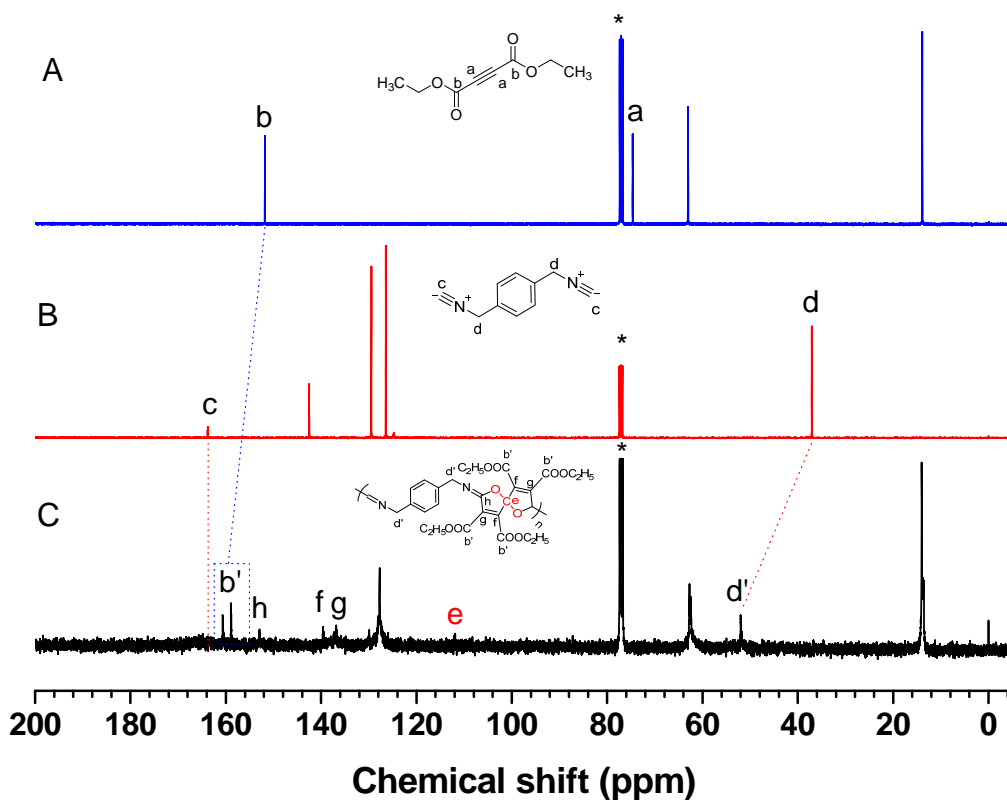

**Figure S16.**  $^{13}\text{C}$  NMR spectra of (A) **1c**, (B) **2b**, and (C) **P1c2b** in  $\text{CDCl}_3$ . The solvent peaks are marked with asterisks.

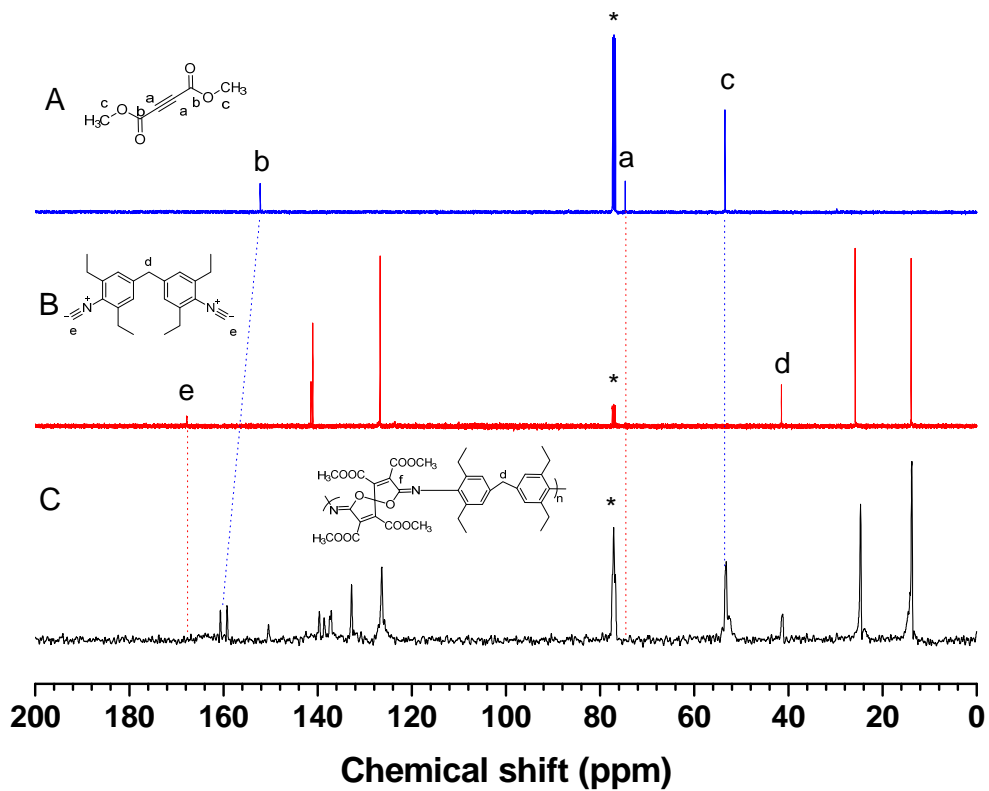

**Figure S17.**  $^{13}\text{C}$  NMR spectra of (A) **1d**, (B) **2a**, and (C) **P1d2a** in  $\text{CDCl}_3$ . The solvent peaks are marked with asterisks.

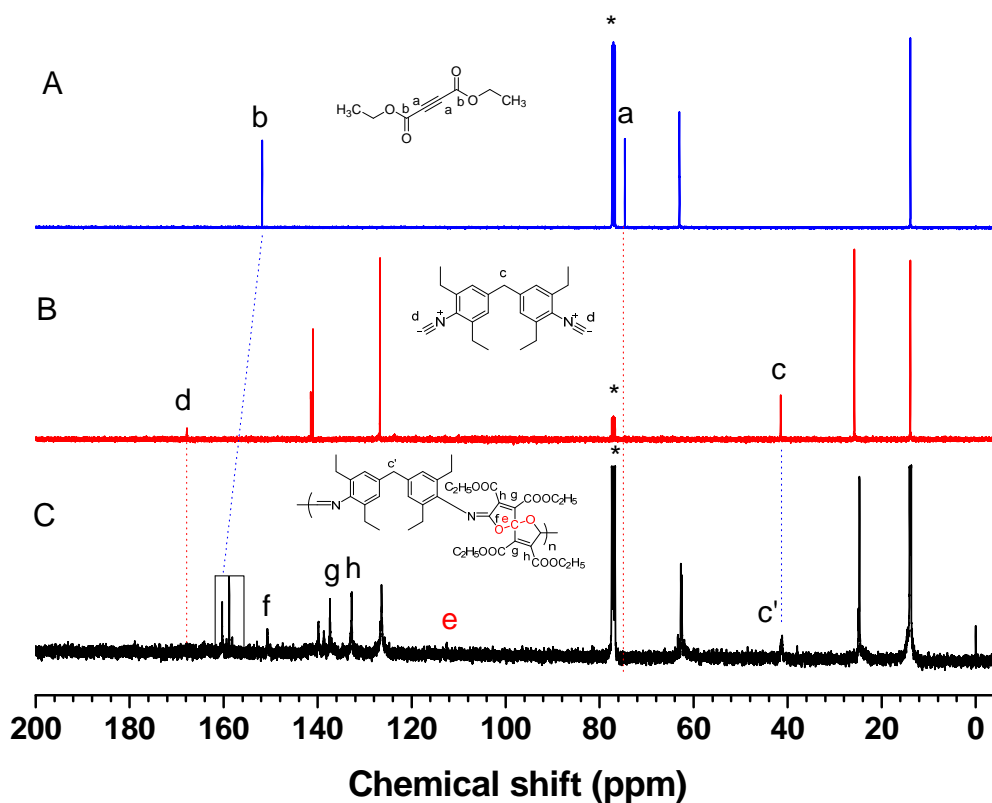

**Figure S18.**  $^{13}\text{C}$  NMR spectra of (A) **1d**, (B) **2b**, and (C) **P1d2b** in  $\text{CDCl}_3$ . The solvent peaks are marked with asterisks.

## 5 The DSC results of spiropolymers

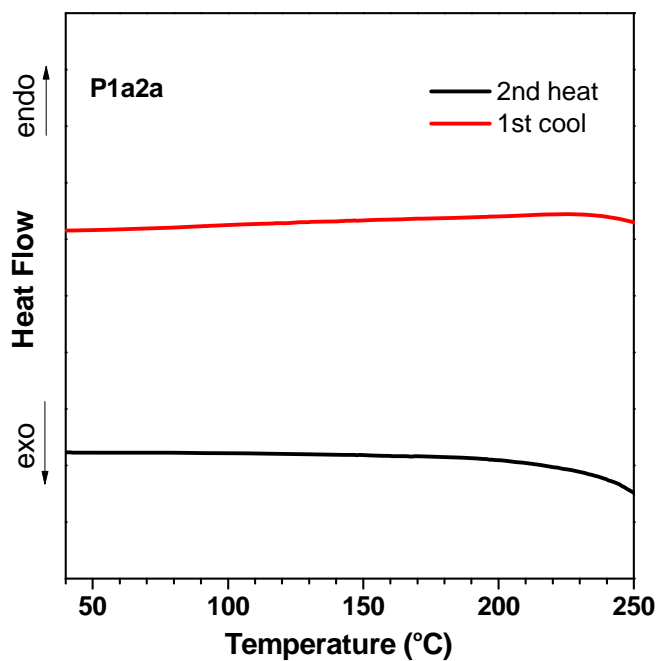

**Figure S19.** DSC curve of **P1a2a**. The measurement was performed under  $\text{N}_2$  at the heating rate of  $10\text{ }^\circ\text{C}/\text{min}$ .

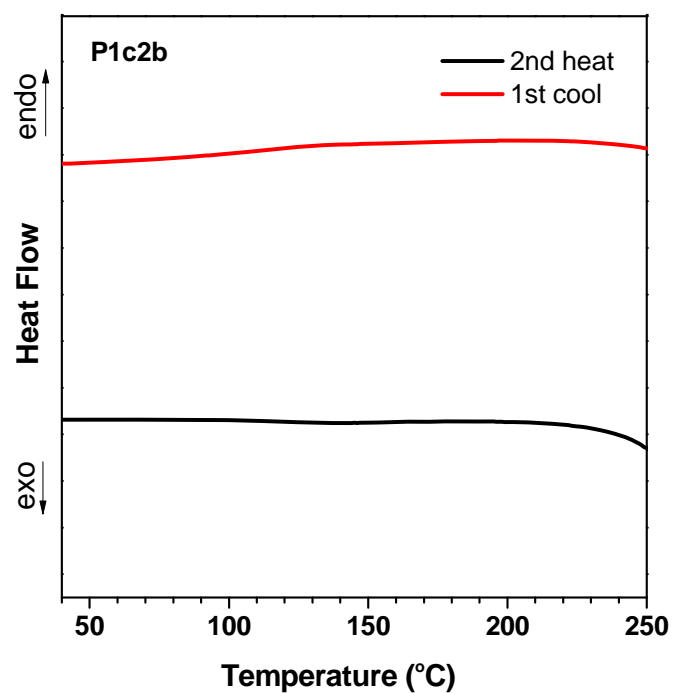

**Figure S20.** DSC curve of **P1c2b**. The measurement was performed under N<sub>2</sub> at the heating rate of 10 °C/min.

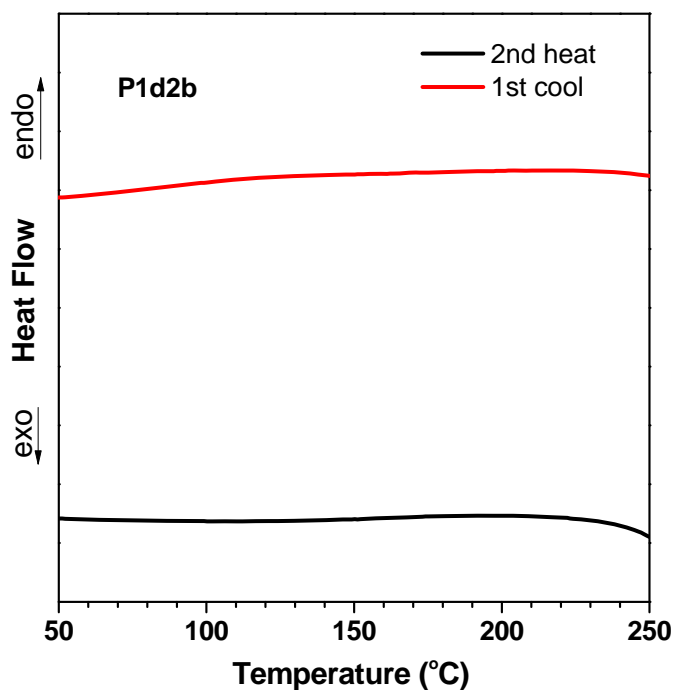

**Figure S21.** DSC curve of **P1d2b**. The measurement was performed under N<sub>2</sub> at the heating rate of 10 °C/min.

## 6 Normalized UV-vis absorption spectra of spiropolymers

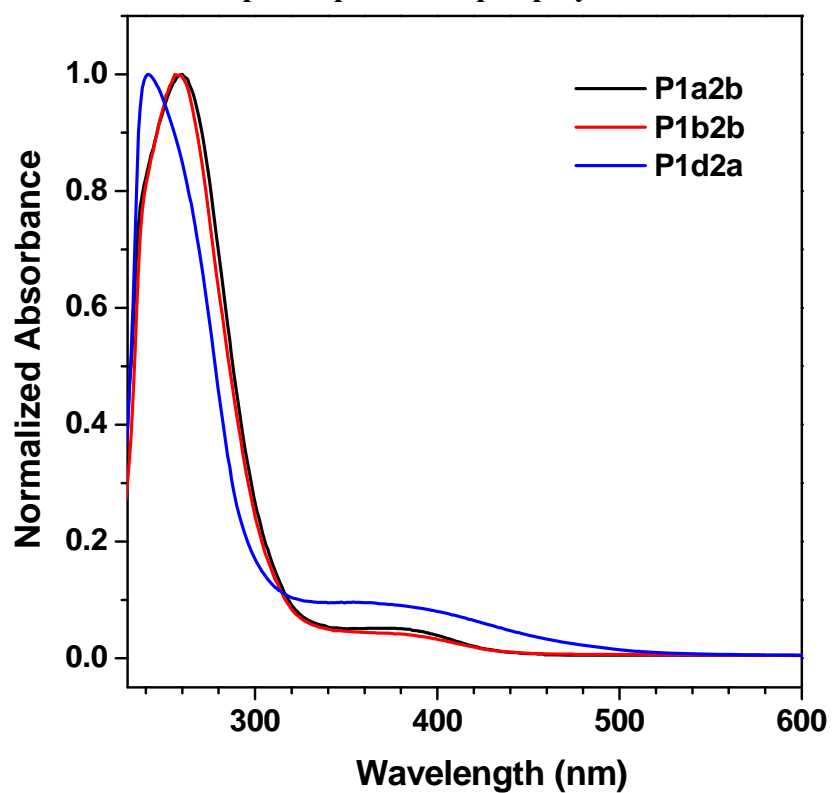

**Figure S22.** Normalized UV-vis absorption spectra of **P1a2b**, **P1b2b**, and **P1d2a** in THF (10  $\mu\text{mol/L}$  of the repeating structure unit as a reference).
